# Supplementary material for: Estimating visual field loss from monoscopic optic disc photography using deep learning model
Source: PubMed Central journal article supplement (PMC7712913; doi:10.1038/s41598-020-78144-1), 2020-12-03
Supplement: 41598_2020_78144_MOESM1_ESM.pdf [file 41598_2020_78144_MOESM1_ESM.pdf]

# **Estimating Visual Field Loss from Monoscopic Optic Disc Photography using Deep Learning Model**

*Jinho Lee, Yong Woo Kim, Ahnul Ha, Young Kook Kim, Ki Ho Park, Hyuk Jin Choi, Jin Wook Jeoung*

**Supplementary Table S1.** Descriptive Statistics of the According to Glaucoma Severity in the Training and Testing Set

|                        | Training/Validation Set |                          |        | Testing Set  |                          |        |
|------------------------|-------------------------|--------------------------|--------|--------------|--------------------------|--------|
|                        | Early Stage*            | Moderate-to-Severe Stage | P      | Early Stage* | Moderate-to-Severe Stage | P      |
| No. of Eyes (patients) | 162 (101)               | 52 (26)                  | N/A    | 31 (23)      | 9 (5)                    | N/A    |
| No. of images          | 372                     | 145                      | N/A    | 99           | 20                       | N/A    |
| Age (years)            | 55.8 ± 13.0             | 59.6 ± 14.0              | 0.041  | 54.2 ± 8.6   | 59.1 ± 5.7               | 0.008  |
| Female (%)             | 54 (53.5%)              | 20 (76.9%)               | 0.167  | 5 (21.7%)    | 2 (40.0%)                | 0.574  |
| IOP (mmHg)             | 14.1 ± 3.5              | 15.1 ± 3.1               | 0.008  | 14.2 ± 3.2   | 15.2 ± 2.8               | 0.132  |
| SE (D)                 | -2.7 ± 3.0              | -3.0 ± 2.8               | 0.175  | -2.5 ± 3.0   | -3.2 ± 3.1               | 0.062  |
| CCT (µm)               | 535.2 ± 33.5            | 525.5 ± 40.2             | <0.001 | 522.1 ± 33.2 | 501.4 ± 35.6             | <0.001 |
| SAP MD (dB)            | -2.2 ± 2.0              | -10.1 ± 3.5              | <0.001 | -1.6 ± 1.9   | -10.0 ± 3.1              | <0.001 |
| SAP PSD (dB)           | 4.8 ± 2.8               | 11.6 ± 3.3               | <0.001 | 4.7 ± 2.5    | 10.4 ± 2.1               | <0.001 |

\* Mean deviation ≥ -6 dB.

dB = Decibels; D = Diopters; CCT = central corneal thickness; SAP = standard automated perimetry; MD = mean deviation; PSD = pattern standard deviation.

**Supplementary Table S2.** Performance metrics of deep learning algorithm for quantification of mean deviation (MD) of standard automated perimetry (SAP) by 5-fold cross-validation of entire dataset

|                          | CV #1 | CV #2 | CV #3 | CV #4 | CV #5 | Mean  | SD    |
|--------------------------|-------|-------|-------|-------|-------|-------|-------|
| R <sup>2</sup> score (%) | 59.1% | 54.9% | 59.9% | 60.8% | 57.7% | 58.4% | 2.06% |
| MAE (dB)                 | 1.96  | 2.10  | 1.91  | 1.87  | 1.92  | 1.95  | 0.079 |

CV = cross-validation; SD = standard deviation; MAE = mean absolute error.

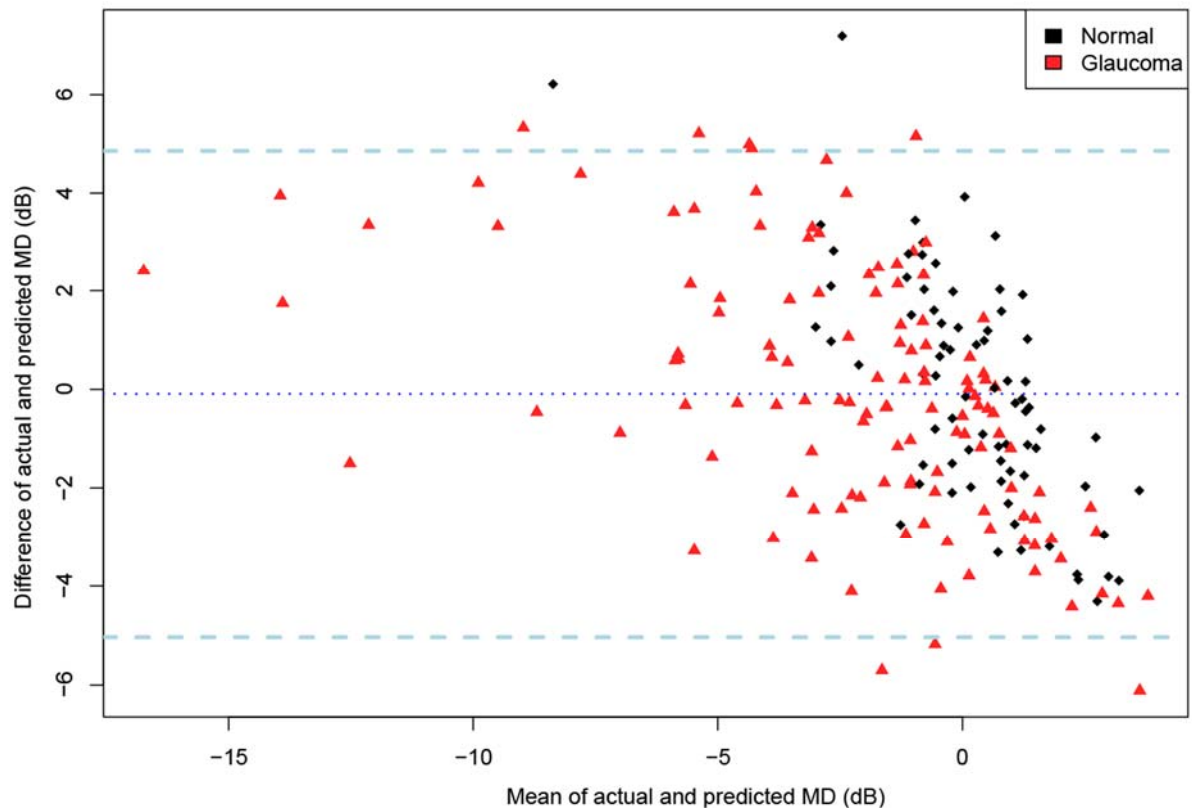

**Supplementary Figure S1.** Bland-Altman plot demonstrating agreement between prediction and measurement of the test dataset. The predicted mean deviation (MD) showed good agreement with the actual measurement (95% confidence limits (CI) [-4.26 dB, 4.86 dB]). No significant systemic bias was observed (bias = -0.09 dB, 95% CI [-0.44, 0.26]).
